# Supplementary material
Source: PubMed Central journal article supplement (PMC1413719)

(A)

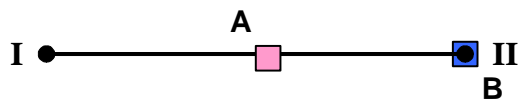

  $g_A = (0.5, 0.5)$

  $g_B = (0, 1)$

(B)

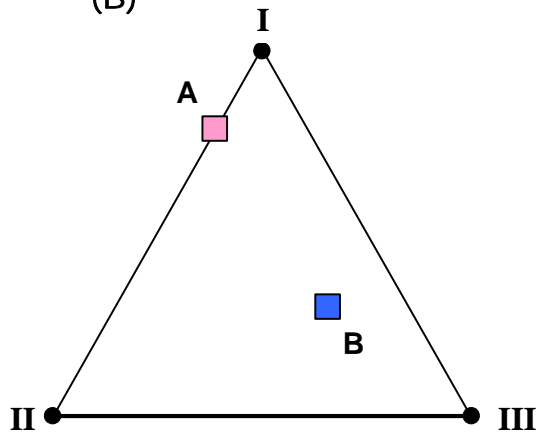

  $g_A = (0.75, 0.25, 0)$

  $g_B = (0.20, 0.10, 0.70)$

(C)

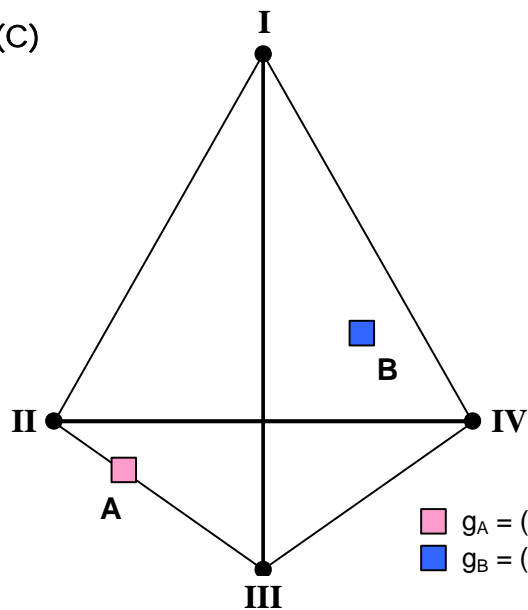

  $g_A = (0, 0.75, 0.25, 0)$

  $g_B = (0.25, 0, 0.25, 0.50)$

Supplement: pnas_0510576103_10.pdf [file pnas_0510576103_10.pdf]

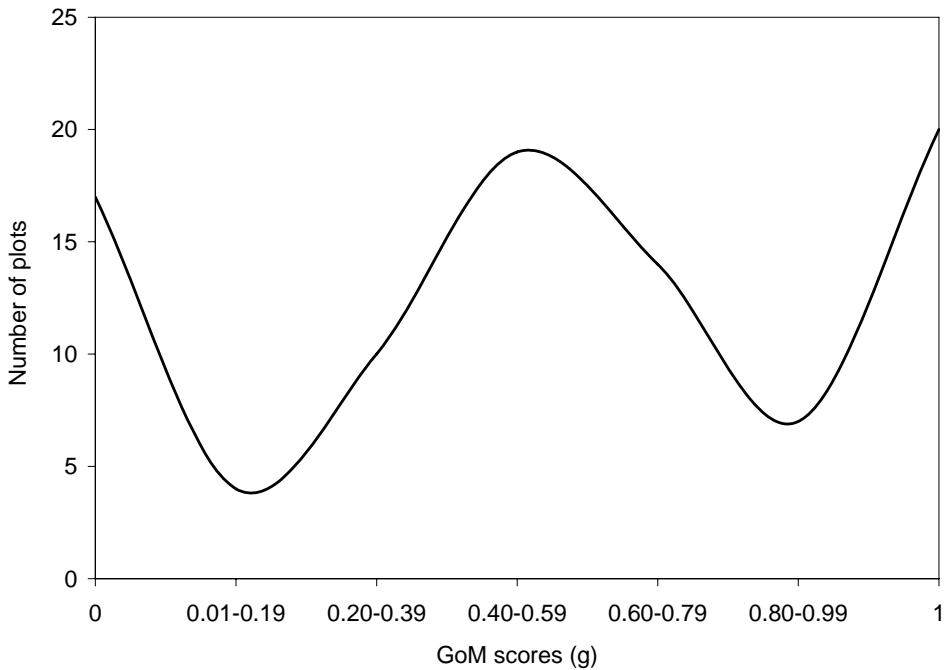

Supplement: pnas_0510576103_11.pdf [file pnas_0510576103_11.pdf]

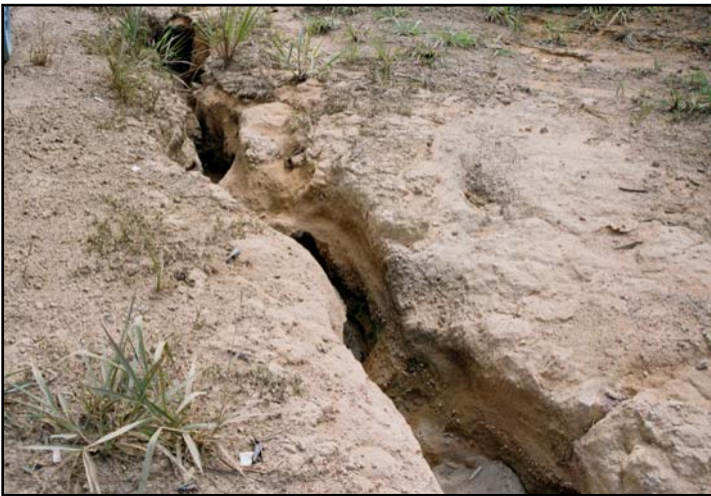

Supplement: pnas_0510576103_14.pdf [file pnas_0510576103_14.pdf]

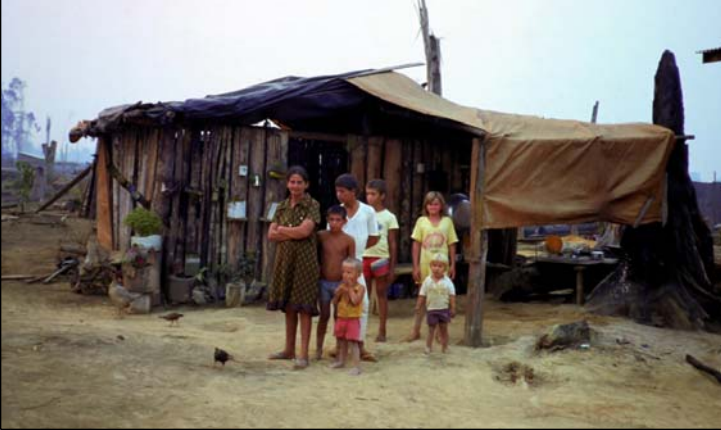

Supplement: pnas_0510576103_16.pdf [file pnas_0510576103_16.pdf]

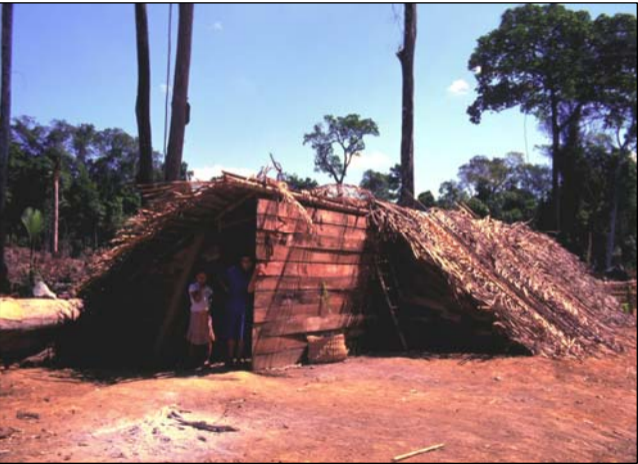

Supplement: pnas_0510576103_17.pdf [file pnas_0510576103_17.pdf]

(A)

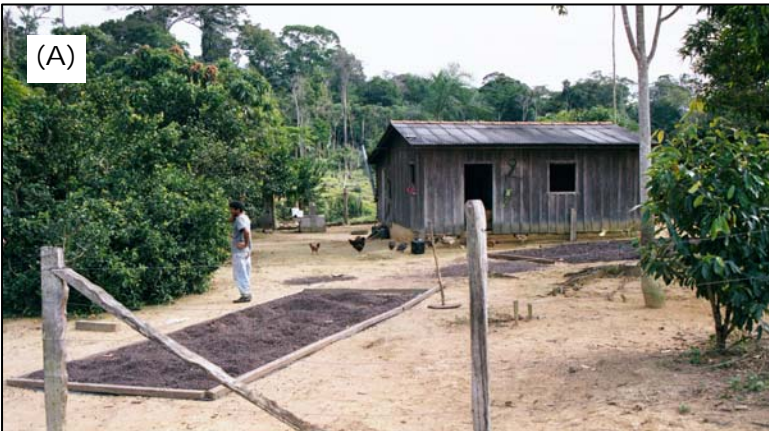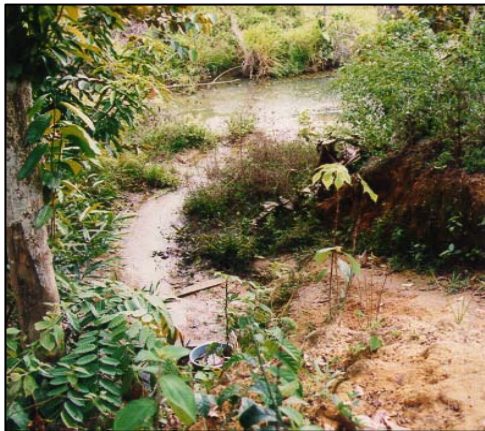

(B)

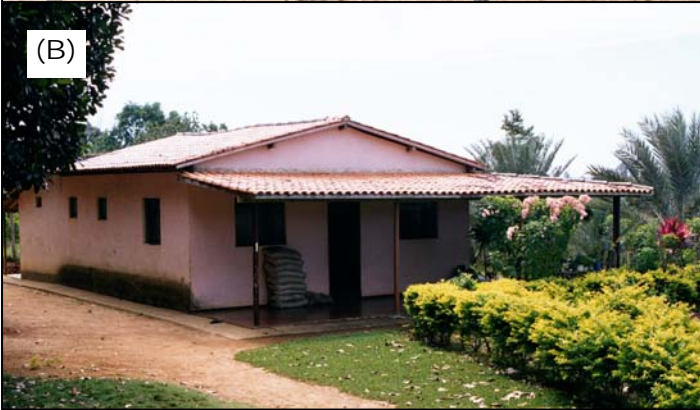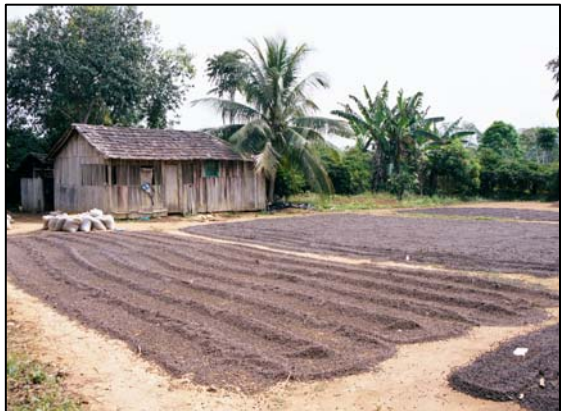

Supplement: pnas_0510576103_19.pdf [file pnas_0510576103_19.pdf]

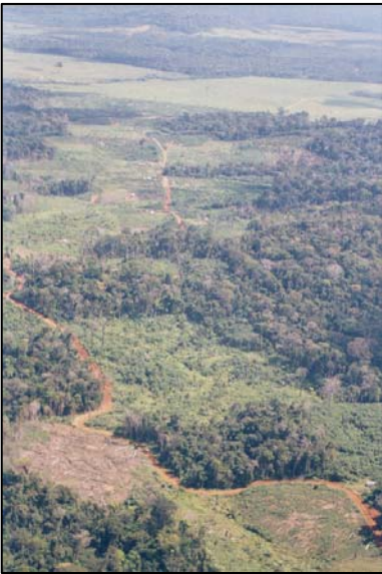

Supplement: pnas_0510576103_21.pdf [file pnas_0510576103_21.pdf]

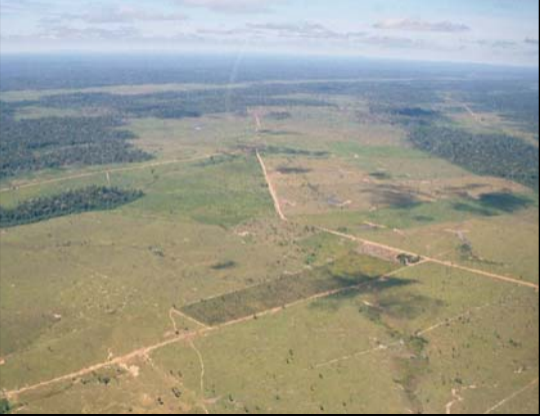

Supplement: pnas_0510576103_22.pdf [file pnas_0510576103_22.pdf]

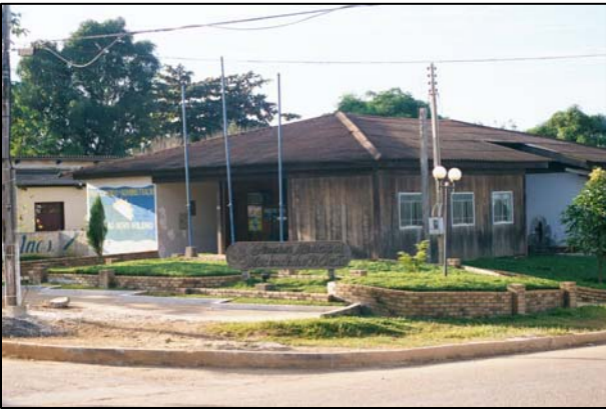

Supplement: pnas_0510576103_25.pdf [file pnas_0510576103_25.pdf]

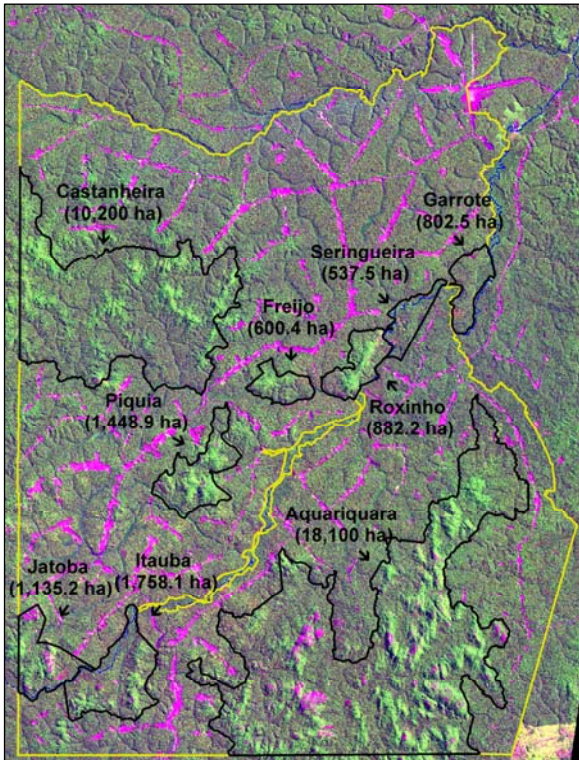

Supplement: pnas_0510576103_27.pdf [file pnas_0510576103_27.pdf]

North-South

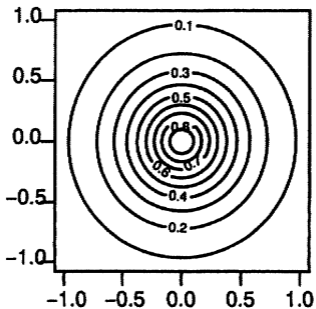

East-West

Supplement: pnas_0510576103_6.pdf [file pnas_0510576103_6.pdf]

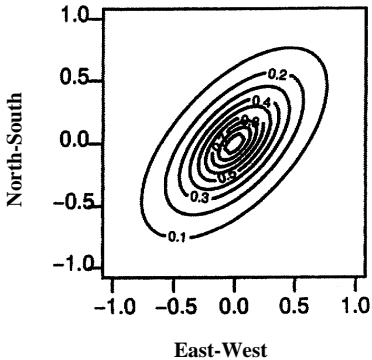

Supplement: pnas_0510576103_7.pdf [file pnas_0510576103_7.pdf]
